# Supplementary material for: Enhancement of photovoltaic performance in ferrocenyl π-extended multi donor–π–acceptor (D–D′–π–A) dyes using chenodeoxycholic acid as a dye co-adsorbent for dye sensitized solar cells
Source: Royal Society of Chemistry journal article supplement (doi:10.1039/d2ra06615g), 2023-01-01

**Enhancement of photovoltaic performance in ferrocenyl  $\pi$ -extended multi donor- $\pi$ -acceptor (D-D'- $\pi$ -A) dyes using chenodeoxycholic acid as a dye co-adsorbent for dye sensitized solar cells**

Selvam Prabu<sup>a</sup>, Thamodharan Viswanathan<sup>a</sup>, Ezhumalai David<sup>a</sup>, Sivanadanam Jagadeeswari<sup>b</sup> and Nallasamy Palanisami<sup>a\*</sup>

<sup>a</sup>Centre for Functional Materials, Department of Chemistry, School of Advanced Sciences, Vellore Institute of Technology, Vellore-632014, Tamil Nadu, India.

<sup>b</sup>Clean Energy Lab, Department of Chemistry, Indian Institute of Technology Madras, Chennai 600036, India.

Corresponding author: E-mail: palanisami.n@gmail.com; palanisami.n@vit.ac.in

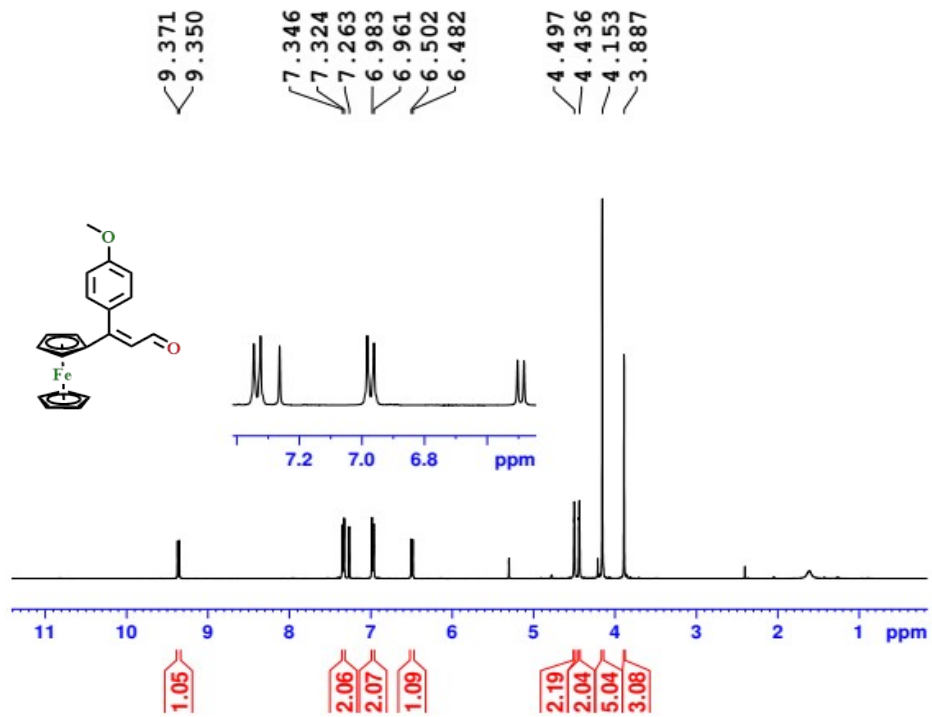

**Figure S1.** <sup>1</sup>H NMR spectrum of 3, 3 (4-

methoxyphenyl) ferrocenyl acrylaldehyde  
in CDCl<sub>3</sub> at 25 °C

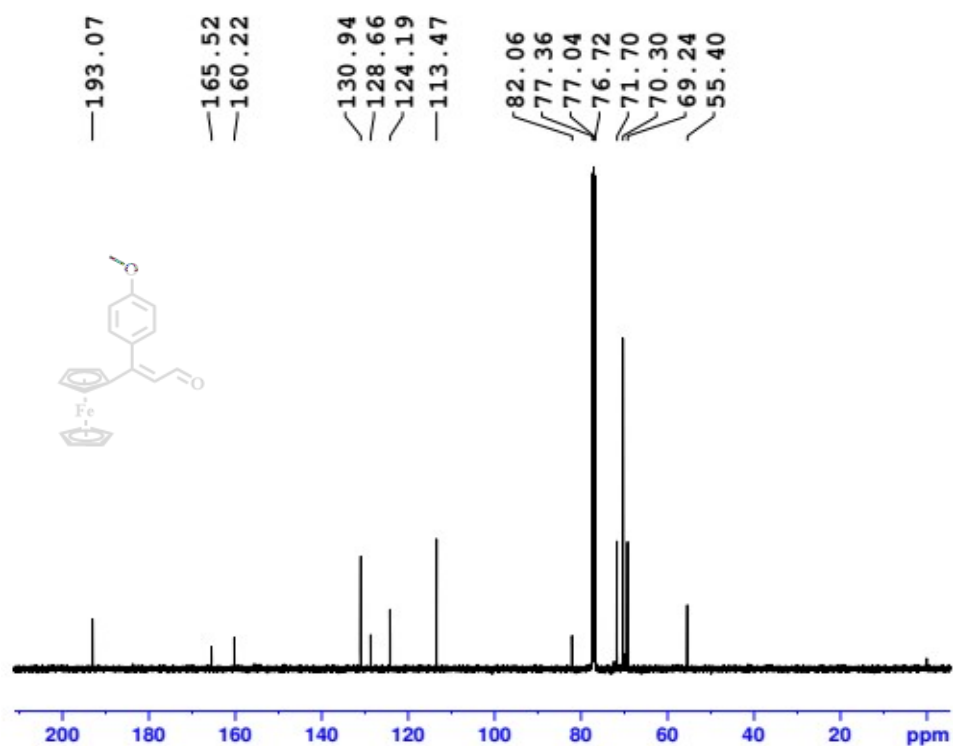

Figure S2. <sup>13</sup>C NMR spectrum of 3,3-(4-methoxyphenyl) ferrocenyl acrylaldehyde in CDCl<sub>3</sub> at 25 °C

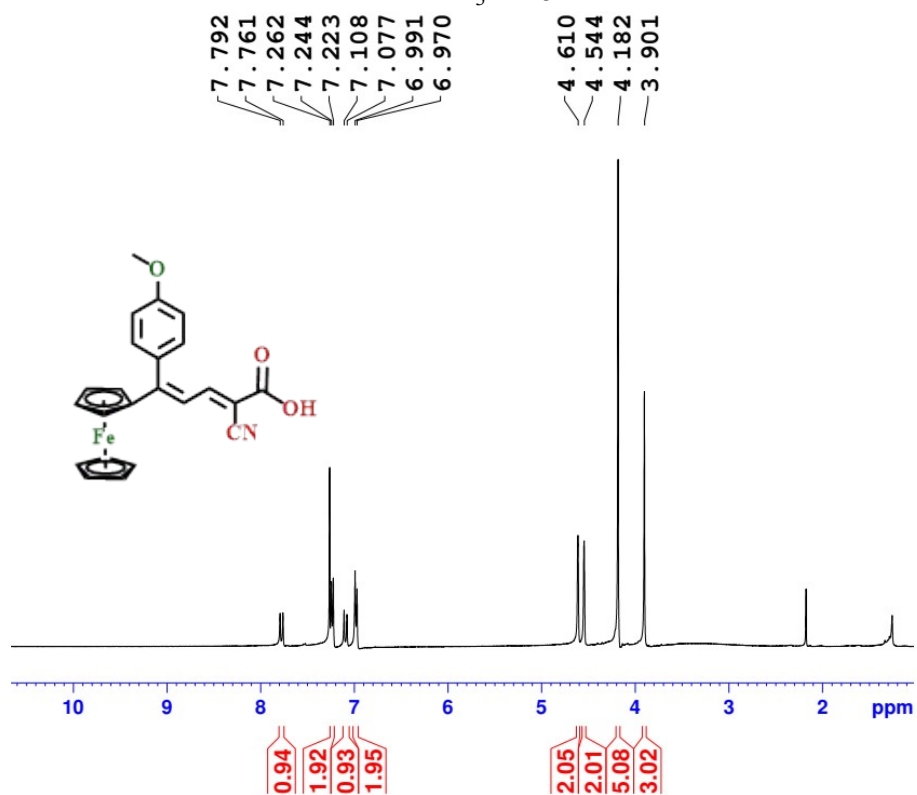

Figure S3.  $^1\text{H}$  NMR spectrum of dye **1** in  $\text{CDCl}_3$  at  $25^\circ\text{C}$

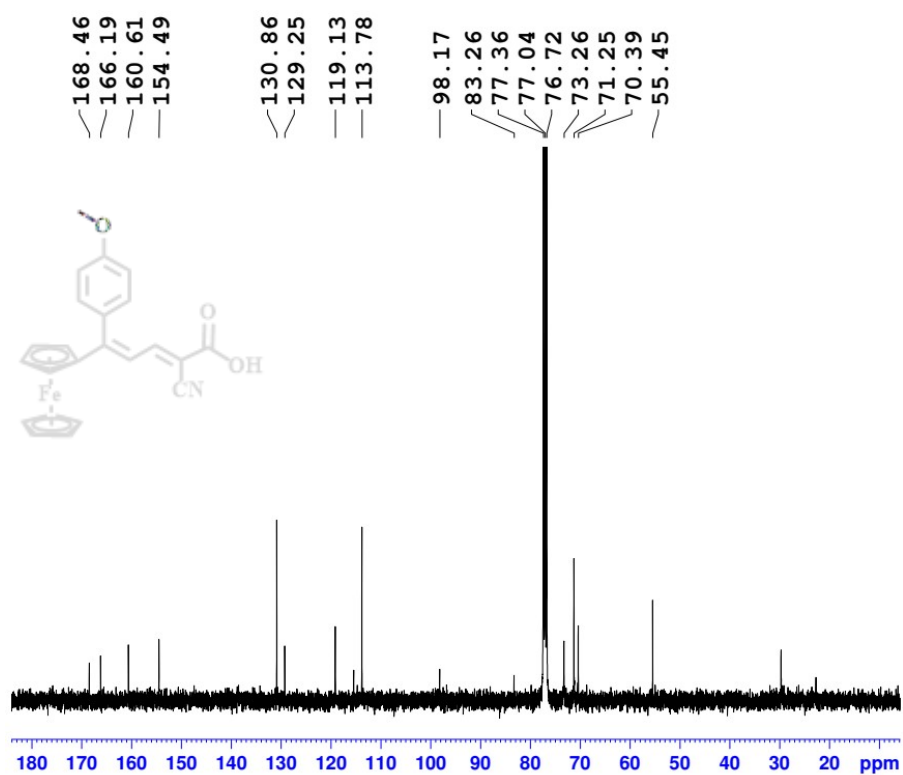

Figure S4.  $^1\text{H}$  NMR spectrum of dye **1** in  $\text{CDCl}_3$  at  $25^\circ\text{C}$

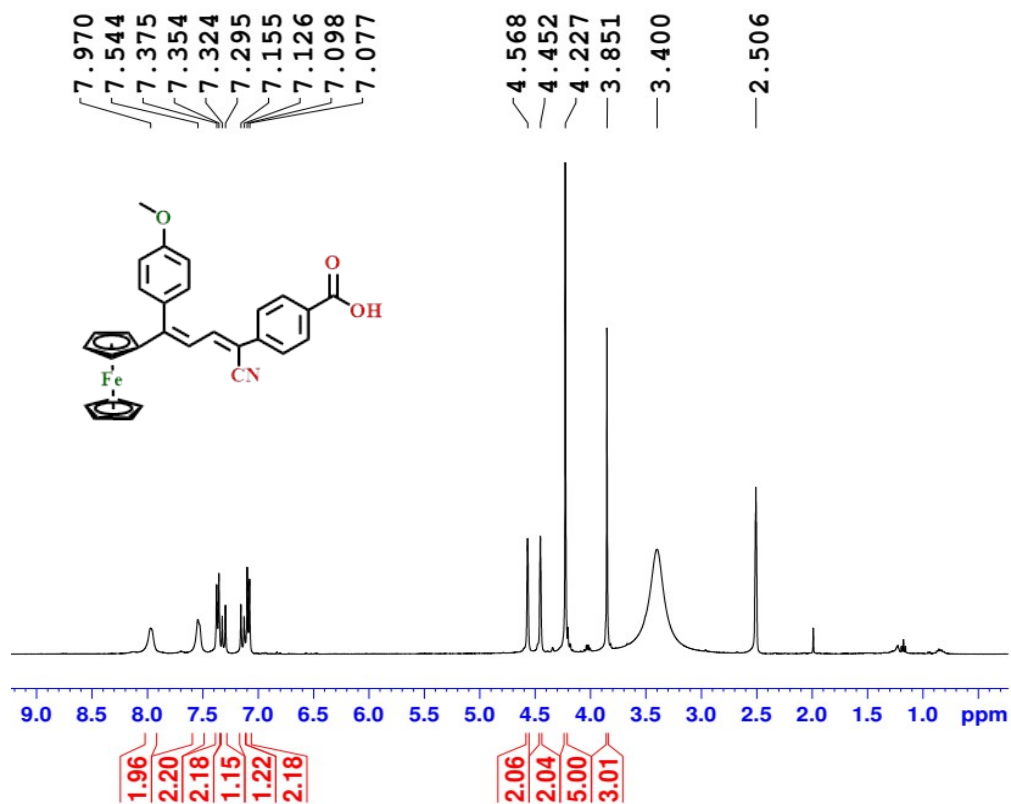

**Figure S5.**  $^1\text{H}$  NMR spectrum of dye **2** in  $\text{DMSO-d}_6$  at  $25^\circ\text{C}$

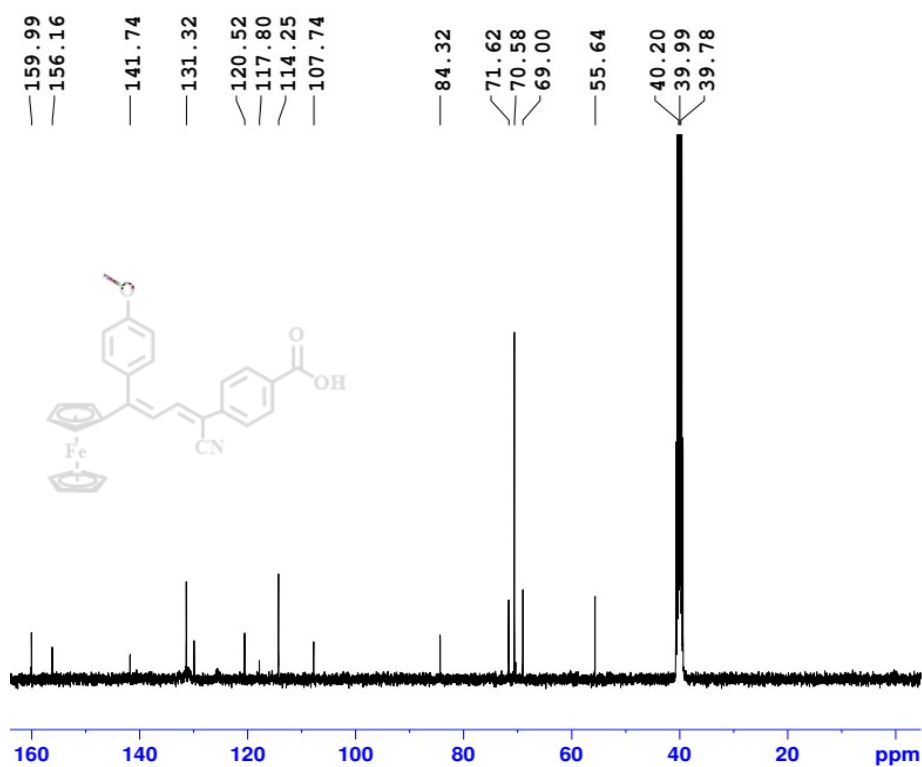

**Figure S6.**  $^{13}\text{C}$  NMR spectrum of dye **2** in  $\text{DMSO-d}_6$  at  $25^\circ\text{C}$

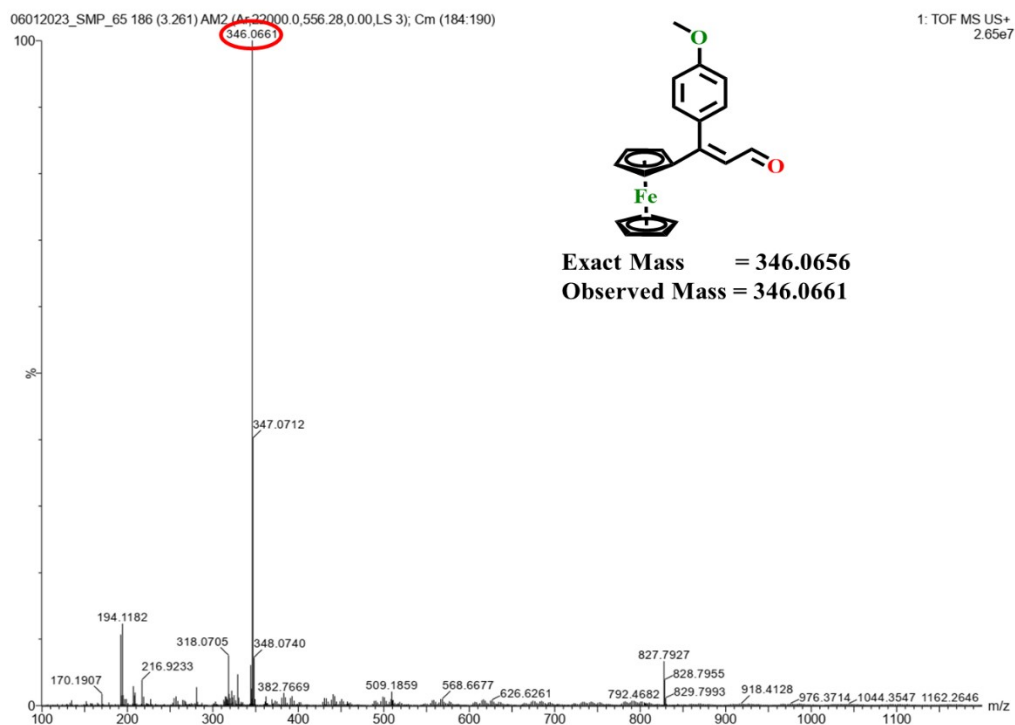

**Figure S7.** HR-Mass spectrum of 3, 3 (4-methoxyphenyl) ferrocenyl acrylaldehyde.

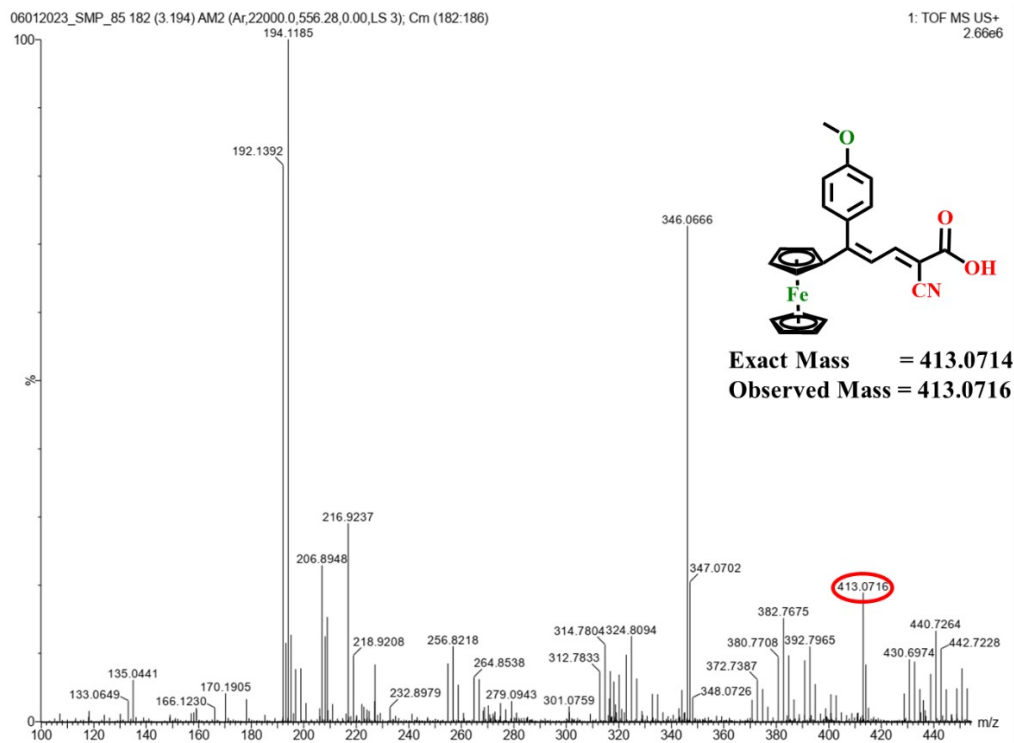

**Figure S8.** HR-Mass spectrum of dye 1.

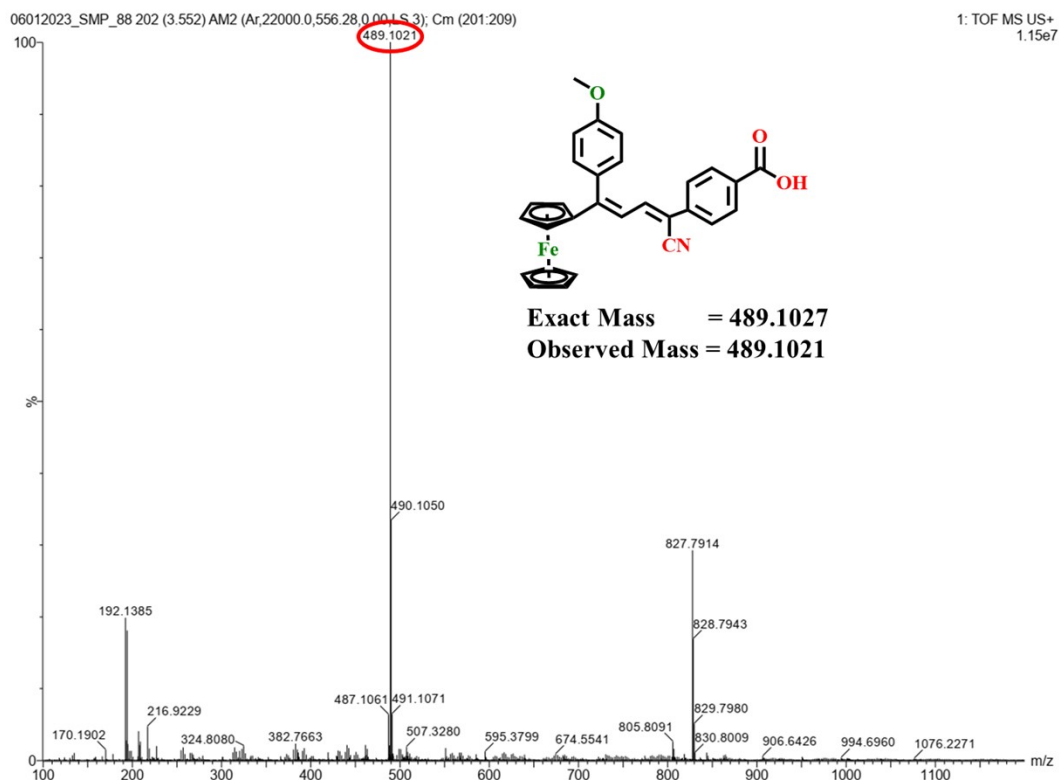

Figure S9. HR-Mass spectrum of dye 2.

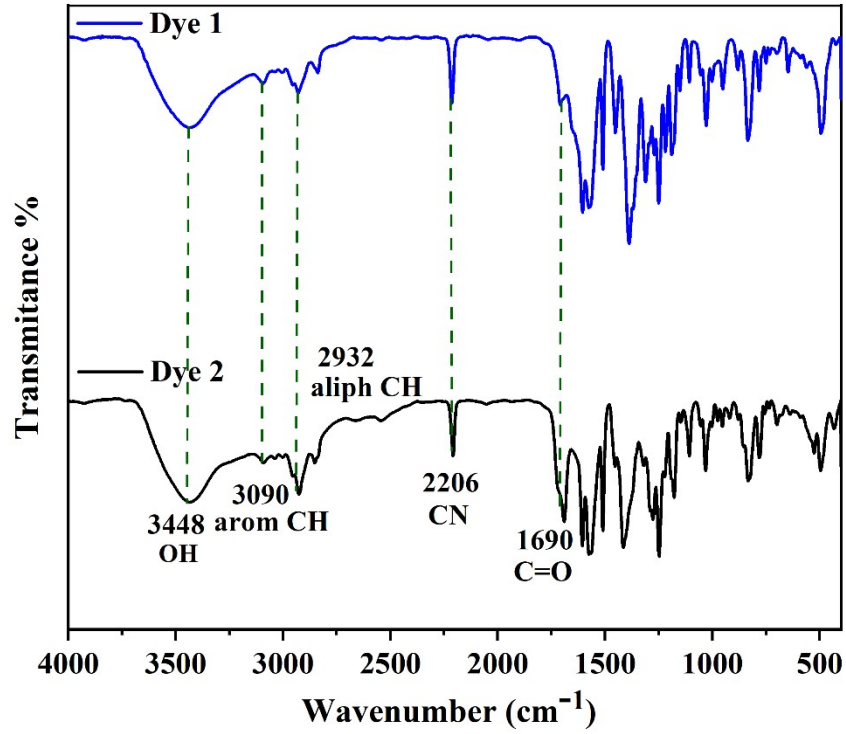

Figure S10. FT-IR spectra of dyes 1 and 2.

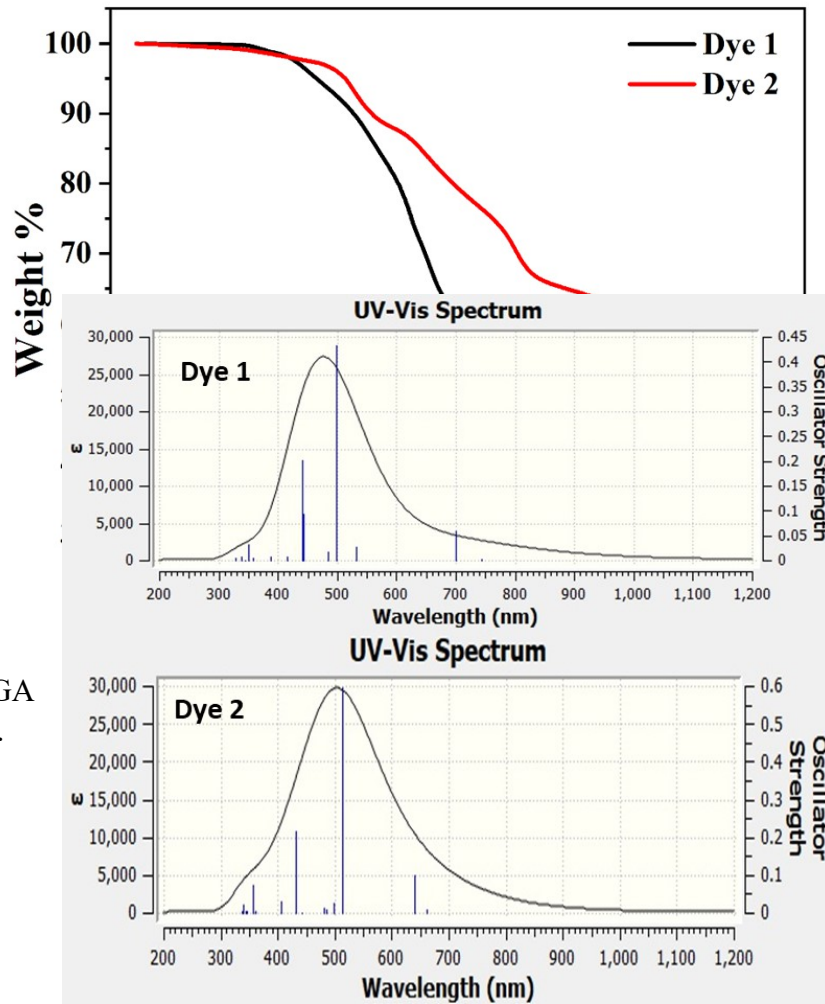

Figure S11. TGA dyes 1 and 2.

curve of the

**Figure S12.** Theoretically calculated absorption spectra for dyes **1** and **2**. The absorption spectra were obtained by TD-DFT calculation with B3LYP/6-31+G(d,p)/LanL2TZf level of theory. The spectra were visualized in Gauss View 6.1.

**Table S1.** Selected transitions obtained from TD-DFT calculation with B3LYP/6-31+G(d,p)/LanL2TZf level of theory.

| Entry        | $\lambda$<br>(nm) | Oscillator<br>strength, $f$ | Energy<br>(eV)            | Selected Major Transitions <sup>a</sup> |
|--------------|-------------------|-----------------------------|---------------------------|-----------------------------------------|
| <b>Dye 1</b> | 497               | 0.4317                      | 2.49                      | H-2 $\rightarrow$ L (79%)               |
|              | 441               | 0.2014                      | 2.81                      | H-4 $\rightarrow$ L (32%)               |
|              | 699               | 0.0580                      | 1.77                      | H $\rightarrow$ L (86%)                 |
|              | 350               | 0.0314                      | 3.54                      | H-6 $\rightarrow$ L (39%)               |
|              | 531               | 0.0261                      | 2.33                      | H-3 $\rightarrow$ L (56%)               |
|              | 484               | 0.0175                      | 2.55                      | H $\rightarrow$ L+3 (32%)               |
| <b>Dye 2</b> | 513               | 0.5953                      | 2.41                      | H-2 $\rightarrow$ L (65%)               |
|              | 431               | 0.2158                      | 2.87                      | H-3 $\rightarrow$ L (63%)               |
|              | 640               | 0.1014                      | 1.93                      | H $\rightarrow$ L (58%)                 |
|              | 356               | 0.0745                      | 3.47                      | H $\rightarrow$ L+1 (84%)               |
|              | 406               | 0.0290                      | 3.06                      | H-4 $\rightarrow$ L (54%)               |
|              | 339               | 0.0198                      | 3.65                      | H-6 $\rightarrow$ L (43%)               |
|              | 485               | 0.0100                      | 2.55                      | H-1 $\rightarrow$ L+6 (32%)             |
| 661          | 0.0068            | 1.87                        | H-1 $\rightarrow$ L (71%) |                                         |

<sup>a</sup> H = HOMO; L = LUMO; only contributions above 10% are included.



**Table S2.** Density frontier orbitals electronic chromophores **1** derived from

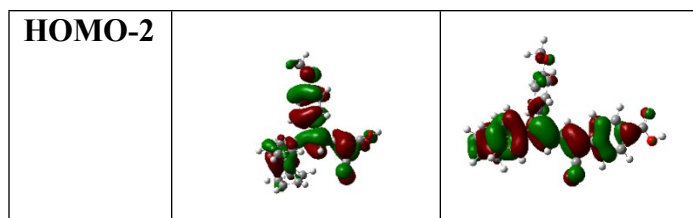

surfaces of the involved in transitions of **2** which is B3LYP/6-

31+G(d,p)/LanL2TZf level of theory using isosurface value of 0.02 au.

| <b>Orbitals</b> | <b>Dye 1</b>                                                                        | <b>Dye 2</b>                                                                         |
|-----------------|-------------------------------------------------------------------------------------|--------------------------------------------------------------------------------------|
| <b>HOMO-5</b>   | 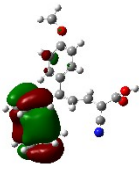 |  |
| <b>HOMO-4</b>   |  |  |
| <b>HOMO-3</b>   |  |  |

|               |                                                                                     |                                                                                      |
|---------------|-------------------------------------------------------------------------------------|--------------------------------------------------------------------------------------|
| <b>HOMO-1</b> | 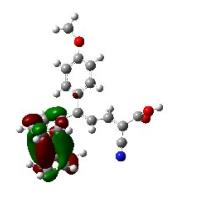   |    |
| <b>HOMO</b>   |    |    |
| <b>LUMO</b>   |    |    |
| <b>LUMO+1</b> |   |   |
| <b>LUMO+2</b> |  |  |
| <b>LUMO+3</b> |  |  |
| <b>LUMO+4</b> |  |  |

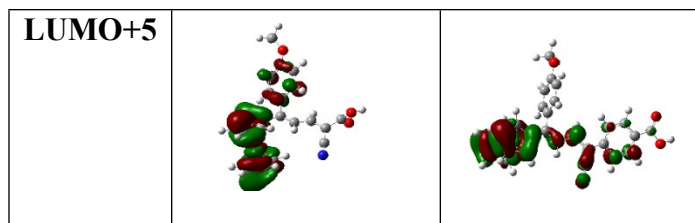

Supplement: d2ra06615g1.pdf [file d2ra06615g1.pdf]
